# Supplementary material for: Engineering the Active Site Lid Dynamics to Improve the Catalytic Efficiency of Yeast Cytosine Deaminase
Source: MDPI journal article supplement (doi:10.3390/ijms24076592), 2023-04-01
Supplement: s1 [file s1]

# Engineering the Active Site Lid Dynamics to Improve the Catalytic Efficiency of Yeast Cytosine Deaminase

Hanzhong Deng,<sup>1,2,3,⊥</sup> Mingming Qin,<sup>1,2,⊥</sup> Zhijun Liu,<sup>4,⊥</sup> Ying Yang<sup>1,2</sup>, Yefei Wang,<sup>1,2,\*</sup> and Lishan Yao<sup>1,2,\*</sup>

<sup>1</sup>Qingdao New Energy Shandong Laboratory, Qingdao Institute of Bioenergy and Bioprocess Technology, Chinese Academy of Sciences, Qingdao, 266101, China

<sup>2</sup>Shandong Energy Institute, Qingdao, 266101, China

<sup>3</sup>University of Chinese Academy of Sciences, Beijing, 100049, China

<sup>4</sup>National Facility for Protein Science, Shanghai Advanced Research Institute, Chinese Academy of Sciences, Shanghai, 201210, China

Supporting Information

**Table S1. Backbone amide H/D exchange rates of residues in the wt-yCD, yCD-RQ, yCD-RQ-1/8SAH, and yCD-RQ-1/4SAH complexed with the TSA\*.**

| Res | WT   | RQ   | 1/8 SAH | 1/4 SAH |
|-----|------|------|---------|---------|
| 8   | F    | F    | F       | F       |
| 10  | F    | F    | F       | F       |
| 11  | F    | F    | F       | F       |
| 12  | F    | F    | F       | F       |
| 13  | F    | F    | F       | F       |
| 14  | 1.07 | 0.94 | 0.88    | 1.06    |
| 15  | S    | S    | S       | S       |
| 16  | S    | S    | S       | S       |
| 17  | S    | S    | S       | S       |
| 18  | S    | S    | S       | S       |
| 19  | S    | S    | S       | S       |
| 20  | S    | S    | S       | S       |
| 21  | S    | S    | S       | S       |
| 22  | S    | S    | S       | S       |
| 23  | S    | S    | S       | S       |
| 24  | S    | S    | S       | S       |
| 25  | S    | S    | S       | S       |
| 26  | S    | S    | S       | S       |
| 28  | 0.04 | 0.06 | 0.04    | 0.05    |
| 29  | F    | F    | F       | F       |
| 30  | S    | S    | S       | S       |
| 31  | S    | S    | S       | S       |
| 33  | S    | S    | S       | S       |
| 34  | S    | S    | S       | S       |
| 35  | S    | S    | S       | S       |
| 36  | S    | S    | S       | S       |
| 37  | S    | S    | S       | S       |
| 38  | S    | S    | S       | S       |
| 39  | S    | S    | S       | S       |
| 40  | 1.15 | 1.27 | 1.34    | 1.51    |
| 41  | F    | F    | F       | F       |
| 42  | F    | F    | F       | F       |
| 43  | 0.44 | 0.43 | 0.35    | 0.43    |
| 44  | 0.92 | 0.85 | 0.81    | 0.99    |
| 46  | S    | S    | S       | S       |
| 47  | S    | S    | S       | S       |
| 48  | 6.35 | 5.26 | 5.16    | 6.36    |
| 49  | S    | S    | S       | S       |
| 50  | F    | F    | F       | F       |

|    |       |      |      |      |
|----|-------|------|------|------|
| 52 | S     | S    | S    | S    |
| 53 | S     | S    | S    | S    |
| 54 | S     | S    | S    | S    |
| 55 | 1.38  | 1.20 | 1.61 | 1.70 |
| 56 | 0.35  | 0.42 | 0.36 | 0.44 |
| 57 | S     | S    | S    | S    |
| 58 | S     | S    | S    | S    |
| 59 | 0.33  | 1.21 | 1.72 | 2.25 |
| 60 | S     | S    | S    | S    |
| 62 | S     | S    | S    | S    |
| 63 | 4.29  | F    | F    | F    |
| 65 | S     | S    | S    | S    |
| 66 | S     | S    | S    | S    |
| 67 | S     | S    | S    | S    |
| 68 | S     | S    | S    | S    |
| 69 | S     | S    | S    | S    |
| 70 | S     | S    | S    | S    |
| 71 | S     | S    | S    | S    |
| 72 | 0.25  | 0.68 | 0.71 | 0.82 |
| 73 | F     | F    | F    | F    |
| 74 | 0.25  | 1.41 | 1.86 | 2.23 |
| 75 | 10.02 | F    | F    | F    |
| 76 | F     | F    | F    | F    |
| 77 | F     | F    | F    | F    |
| 78 | 3.06  | F    | F    | F    |
| 79 | 0.17  | 1.30 | 1.74 | 1.98 |
| 80 | 0.17  | 1.54 | 1.95 | 2.47 |
| 81 | F     | F    | F    | F    |
| 82 | S     | S    | S    | S    |
| 83 | S     | S    | S    | S    |
| 84 | S     | S    | S    | S    |
| 85 | S     | S    | S    | S    |
| 86 | S     | S    | S    | S    |
| 87 | S     | S    | S    | S    |
| 89 | S     | S    | S    | S    |
| 91 | 0.06  | 0.20 | 0.11 | 0.37 |
| 93 | S     | S    | S    | S    |
| 94 | S     | S    | S    | S    |
| 95 | S     | S    | S    | S    |
| 96 | S     | S    | S    | S    |
| 97 | S     | S    | S    | S    |
| 98 | S     | S    | S    | S    |

|     |      |      |      |      |
|-----|------|------|------|------|
| 99  | S    | S    | S    | S    |
| 100 | S    | S    | S    | S    |
| 101 | S    | S    | S    | S    |
| 102 | S    | S    | S    | S    |
| 103 | S    | S    | S    | S    |
| 105 | S    | S    | S    | S    |
| 106 | S    | S    | S    | S    |
| 107 | S    | S    | S    | S    |
| 108 | S    | S    | S    | S    |
| 109 | S    | S    | S    | S    |
| 110 | S    | S    | S    | S    |
| 111 | 0.93 | 0.66 | 0.49 | 0.58 |
| 112 | S    | S    | S    | S    |
| 114 | 0.21 | 0.15 | 0.09 | 0.13 |
| 115 | F    | F    | F    | F    |
| 116 | F    | F    | F    | F    |
| 118 | F    | F    | F    | F    |
| 119 | F    | F    | F    | F    |
| 120 | F    | F    | F    | F    |
| 121 | F    | F    | F    | F    |
| 122 | 1.26 | 0.81 | 0.61 | 0.78 |
| 123 | 2.76 | 1.85 | 1.71 | 2.21 |
| 124 | F    | F    | F    | F    |
| 126 | F    | F    | F    | F    |
| 128 | 0.76 | 0.68 | 0.60 | 0.63 |
| 129 | F    | F    | F    | F    |
| 130 | S    | S    | S    | S    |
| 131 | F    | F    | F    | F    |
| 132 | S    | S    | S    | S    |
| 133 | S    | S    | S    | S    |
| 134 | 0.39 | 0.35 | 0.28 | 0.34 |
| 135 | F    | F    | F    | F    |
| 136 | F    | F    | F    | F    |
| 137 | 0.26 | 0.25 | 0.21 | 0.26 |
| 138 | 1.75 | 1.36 | 1.63 | 1.79 |
| 139 | 3.60 | 3.53 | 4.38 | 4.93 |
| 140 | 1.22 | 1.08 | 1.12 | 1.35 |
| 141 | S    | S    | S    | S    |
| 142 | S    | S    | S    | S    |
| 143 | 0.38 | 0.42 | 0.38 | 0.46 |
| 144 | S    | S    | S    | S    |
| 145 | S    | S    | S    | S    |

|     |      |      |       |       |
|-----|------|------|-------|-------|
| 146 | S    | S    | S     | S     |
| 147 | S    | S    | S     | S     |
| 148 | S    | S    | S     | S     |
| 150 | F    | F    | F     | F     |
| 151 | 5.10 | 7.89 | 10.71 | F     |
| 152 | S    | S    | S     | S     |
| 153 | 0.05 | 0.37 | 0.40  | 0.61  |
| 154 | 0.78 | 2.55 | 3.58  | 7.16  |
| 155 | 1.38 | 8.77 | 10.66 | F     |
| 156 | 0.24 | 1.51 | 2.31  | 3.87  |
| 157 | 1.21 | 5.31 | 7.82  | 10.08 |
| 158 | 0.10 | F    | F     | F     |

---

\*F means that the exchange rate is faster than the detection limit ( $15 \text{ h}^{-1}$ ), and S means that the exchange does not occur during the detection period (6 h).

**Table S2. Data collection and refinement statistics.<sup>a</sup>**

| Protein                                             | yCD-RQ                     | yCD-RQ-1/8SAH               | yCD-RQ-1/8SAH                            |
|-----------------------------------------------------|----------------------------|-----------------------------|------------------------------------------|
| Ligand                                              | Apo                        | Apo                         | 4-[S]-hydroxyl-3,4<br>-dihydropyrimidine |
| PDB Entry                                           | 8I3N                       | 8I3O                        | 8I3P                                     |
| <b>Data collection</b>                              |                            |                             |                                          |
| Space group                                         | <i>P 1 2 1 1</i>           | <i>P 1 2 1 1</i>            | <i>P 1 2 1 1</i>                         |
| Unit cell dimensions                                |                            |                             |                                          |
| a, b, c (Å)                                         | 61.319 64.273              | 61.669 64.47                | 49.175 68.9                              |
|                                                     | 83.092                     | 83.092                      | 49.424                                   |
| $\alpha, \beta, \gamma$ (°)                         | 90 97.69 90                | 90 97.965 90                | 90 101.581 90                            |
| Multiplicity                                        | 6.3 (6.0)                  | 3.7 (3.8)                   | 2.5 (2.5)                                |
| Completeness (%)                                    | 98.68 (98.00)              | 96.61 (97.60)               | 85.99 (89.17)                            |
| <i>I</i> / $\sigma$ <i>I</i>                        | 16.12 (7.64)               | 12.31 (2.97)                | 19.03 (5.39)                             |
| <i>R</i> <sub>merge</sub>                           | 0.079 (0.213)              | 0.069(0.584)                | 0.040 (0.185)                            |
| Wilson B factor (Å <sup>2</sup> )                   | 23.92                      | 22.35                       | 10.80                                    |
| <i>CC</i> <sub>1/2</sub>                            | 0.997 (0.986)              | 0.996 (0.873)               | 0.998 (0.948)                            |
| <b>Refinement</b>                                   |                            |                             |                                          |
| Resolution range (Å)                                | 34.67 - 2.00 (2.07 - 2.00) | 34.68 - 1.73 (1.792 - 1.73) | 33.41 - 1.3<br>(1.346 - 1.3)             |
| NO. reflections                                     | 42979 (4270)               | 65362 (6554)                | 68215 (7046)                             |
| <i>R</i> <sub>work</sub> / <i>R</i> <sub>free</sub> | 0.1739/0.2071              | 0.2029/0.2170               | 0.1572/0.1789                            |
| Number of non-hydrogen<br>atoms                     | 5099                       | 5134                        | 2886                                     |
| Macromolecules                                      | 4586                       | 4586                        | 2511                                     |
| Ligands/ions                                        | 4                          | 4                           | 26                                       |
| Solvent                                             | 509                        | 544                         | 349                                      |
| Average B-factor                                    | 26.62                      | 28.14                       | 16.24                                    |
| Macromolecules                                      | 25.80                      | 27.06                       | 14.92                                    |
| Ligands                                             | 17.65                      | 23.33                       | 15.73                                    |
| Solvent                                             | 34.13                      | 37.28                       | 25.83                                    |
| r.m.s.d. for ideal value                            |                            |                             |                                          |
| Bond length (Å)                                     | 0.003                      | 0.006                       | 0.016                                    |
| Bond angle (°)                                      | 0.51                       | 0.58                        | 1.43                                     |
| Ramachandran plot                                   |                            |                             |                                          |
| Favored/allowed/outliers<br>(%)                     | 98.66/1.34/0               | 99.33/0.67/0                | 98.47/1.53/0                             |

<sup>a</sup>Values for the highest resolution shell are given in parentheses.

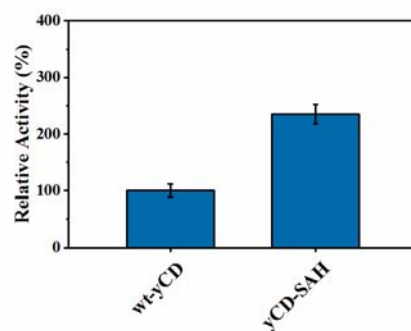

**Figure S1.** wt-yCD and yCD-SAH relative activity against 5-FC where the wt-yCD activity set to 100%. The reaction mixture contained 10 mM 5-FC and 0.05  $\mu$ M yCD in a buffer of 20 mM Tris, 100mM NaCl, pH 7.0. The reactions were carried out at 303 K in triplicates. The error bars are the standard deviation.
